# Supplementary material for: Transferability of genetic loci and polygenic scores for cardiometabolic traits in British Pakistanis and Bangladeshis
Source: medRxiv preprint, doi:10.1101/2021.06.22.21259323, version 1 (2021-06-24)
Supplement: Supplementary Figures [file 259323_file02.pdf]

## Supplementary Figures

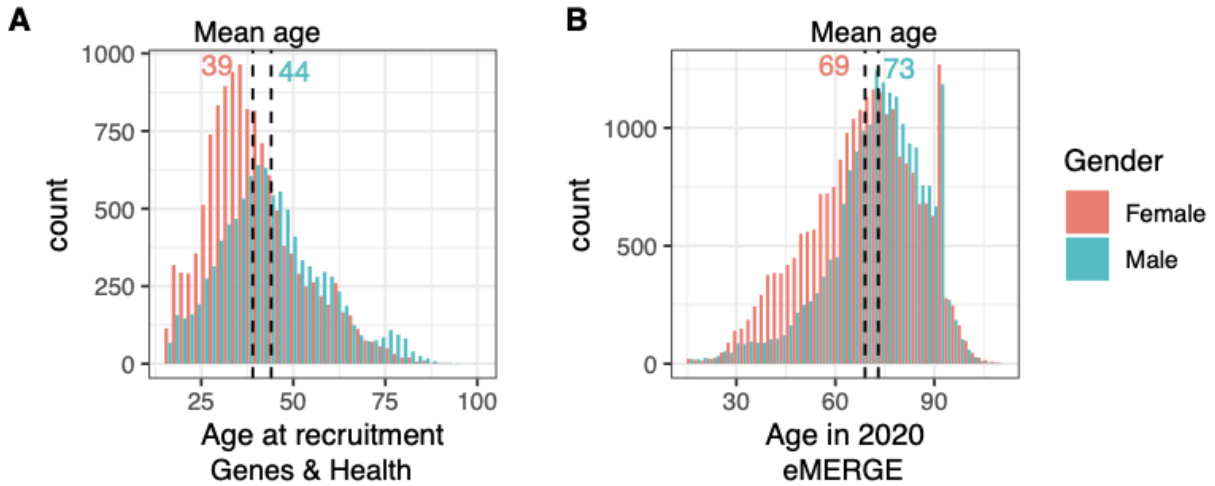

**Supplementary Figure 1. Age distributions of G&H (A) and eMERGE (B).** Red indicates female participants and blue indicates male participants. Vertical dashed lines indicate the average age. In G&H, 56.5% of the 22,490 individuals with electronic health record data are female, with the mean age 39.4 (standard deviation, SD: 13.1) years old for women and 44.3 (SD: 14.3) for men. In eMERGE, 54.5% of the 42,802 individuals are female, with the mean age 69.1 (SD: 16.7) and 73.1 (SD: 14.7) for women and men, respectively.

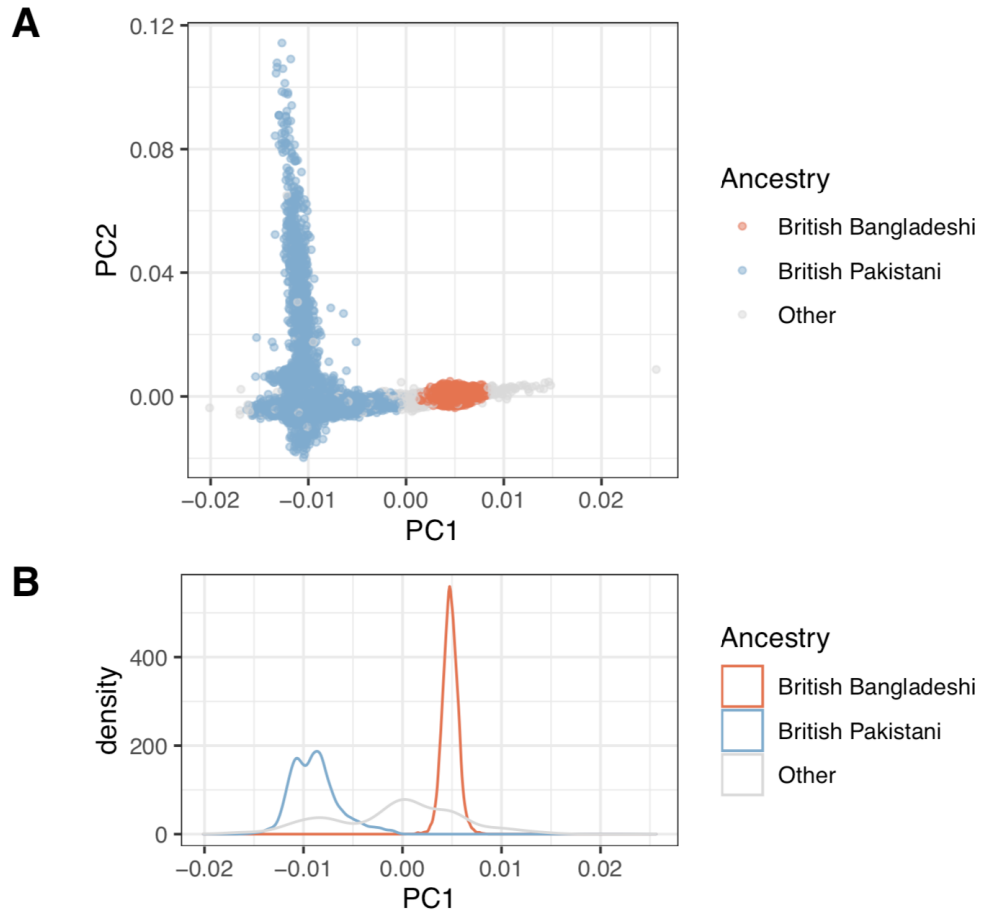

**Supplementary Figure 2. Principal component analysis (PCA) of 28,022 genotyped individuals from the Genes & Health (G&H) cohort. A.** PC1 and PC2 for all samples. Red indicates self-declared British Bangladeshi samples (N=17,721) and blue represents self-declared British Pakistani samples (N=9,694). We excluded samples who self-reported as coming from other ethnic groups (“Other”) or who did not report ethnicity information, as well as genetically-inferred outliers (those with PC1 further than  $\pm 3$  standard deviations from the mean of PC1 for the individuals who self-reported as coming from that group). These samples are in grey (N=607). **B.** Density plot for PC1, which clearly differentiates self-declared British Bangladeshis from self-declared British Pakistanis.

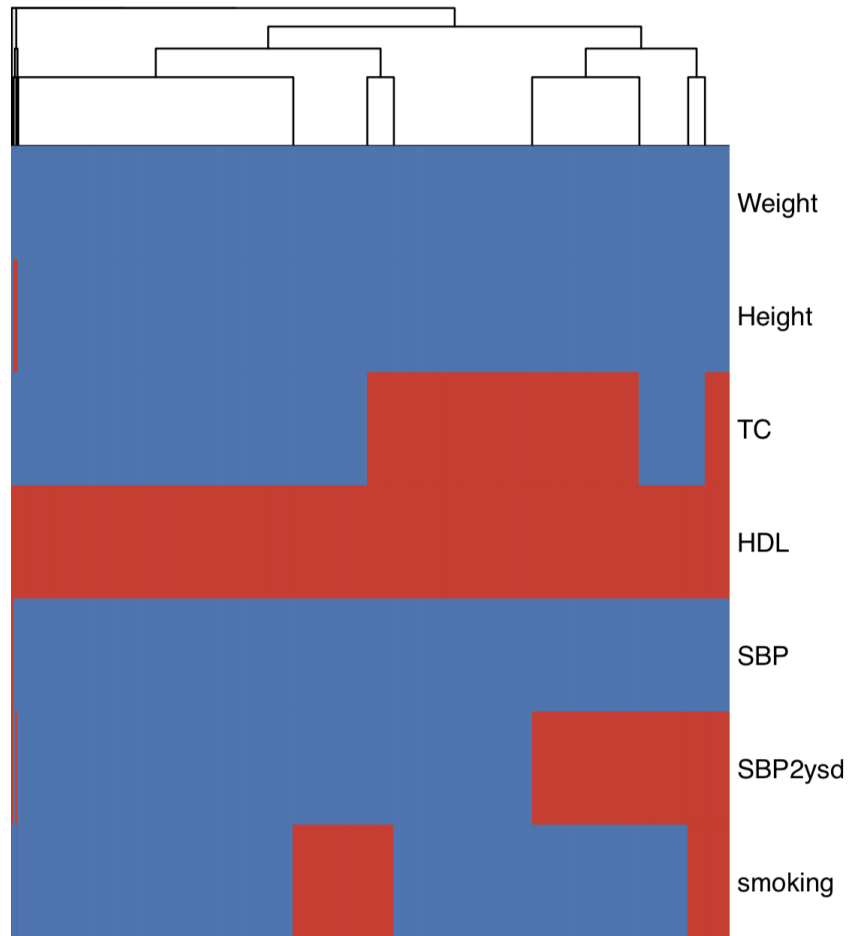

**Supplementary Figure 3. Pattern of missingness for continuous variables in the QRISK3 algorithm.** Columns represent individuals (N=9,477, before removing relatives) and rows represent variables (TC: total cholesterol; HDL: high-density lipoprotein cholesterol; SBP: systolic blood pressure; SBP2ysd: standard deviation of SBP measurements within 2 years). Missing data are in red.

A

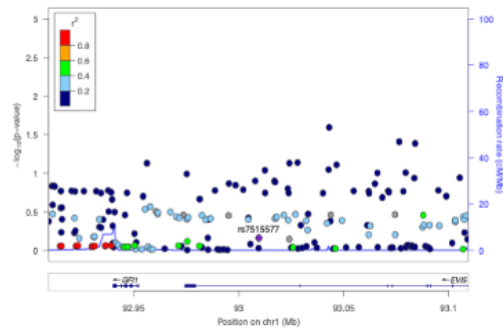

B

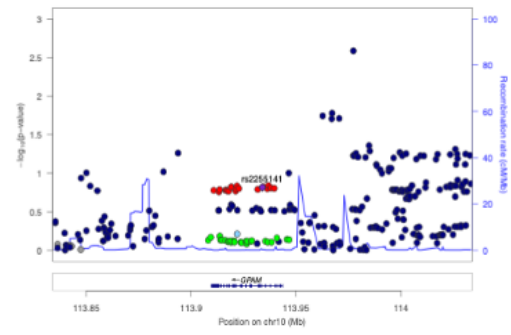

C

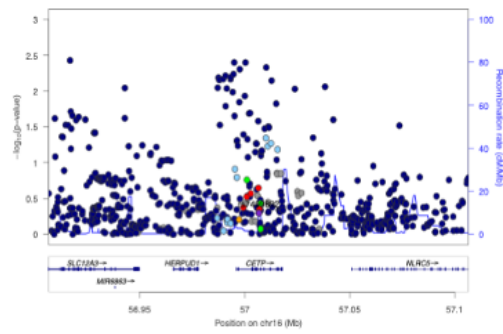

D

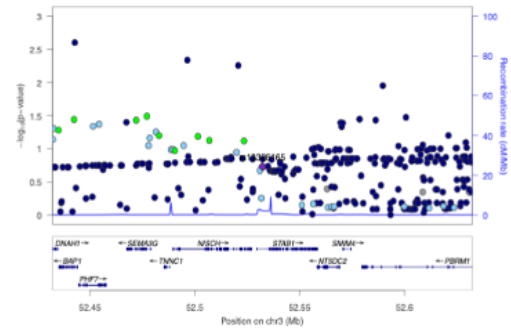

E

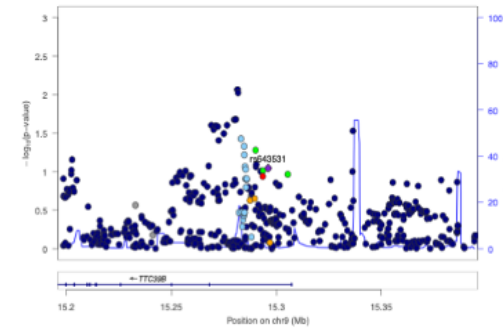

F

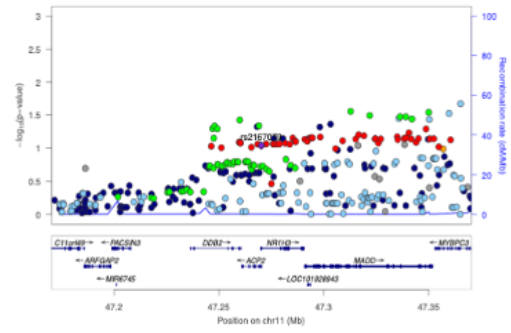

G

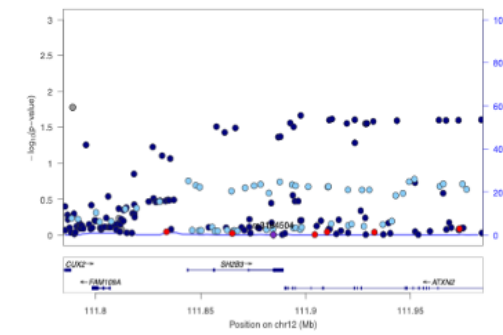

H

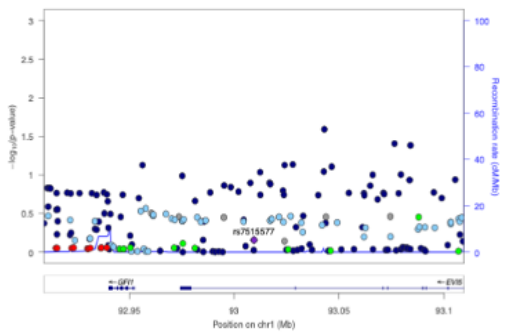

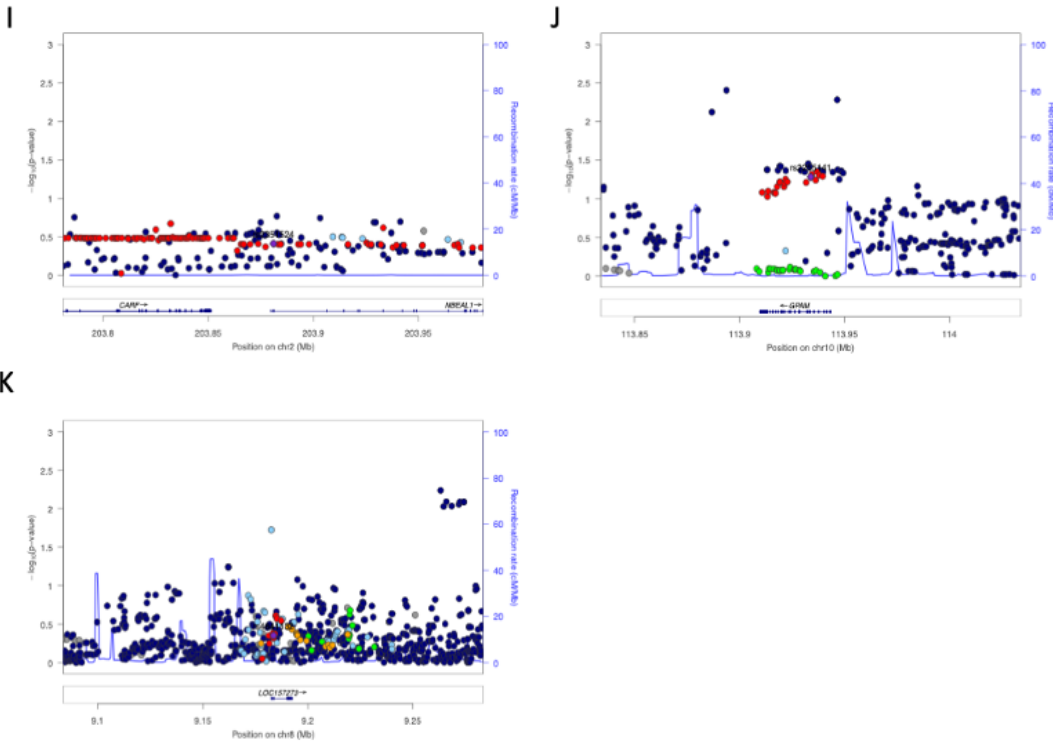

**Supplementary Figure. 4. Regional association plots for non-transferable loci in G&H (Credible set  $p > 0.05$  and no variant within 50kb of locus with  $p < 1 \times 10^{-3}$ ).** A. LDL-C, *EVI5* locus (rs7515577). B. LDL-C, *GPAM* locus (rs2255141). C. LDL-C, *CETP* locus (rs7499892). D. HDL-C *STAB1* locus (rs13326165). E. HDL-C, *TTC39B* locus (rs643531). F. HDL-C, *ACP2* locus (rs2167079). G. HDL-C, *SH2B3* locus (rs3184504). H. Total Cholesterol, *EVI5* locus (rs7515577). I. Total Cholesterol, *NBEAL1* locus (rs2351524). J. Total Cholesterol, *GPAM* locus (rs2255141). K. Triglycerides, *NECAP2* locus (rs4841132). Colour of the points corresponds to the strength of linkage disequilibrium ( $r^2$ ) of each potential causal variant (in brackets) identified in EUR ancestry labelled and coloured in purple.

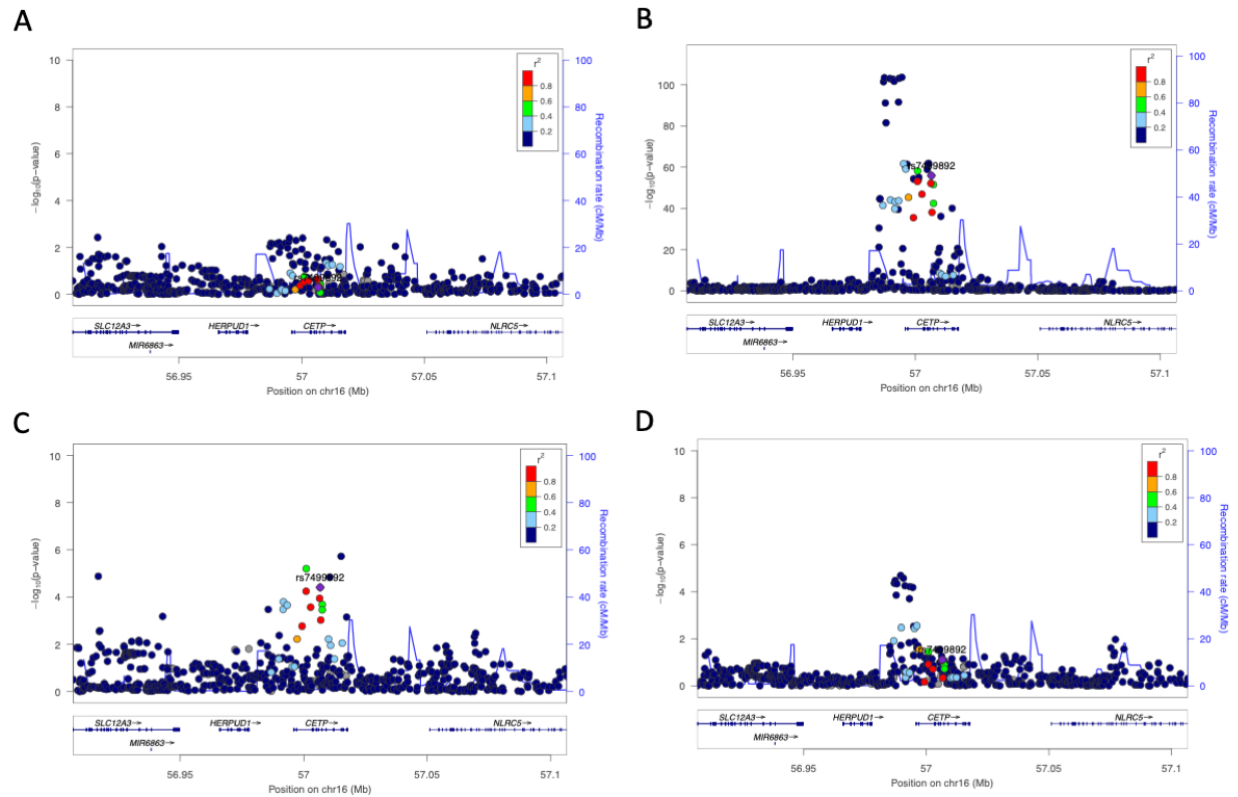

**Supplementary Figure. 5. Regional association plots for *CETP* locus across lipid traits in G&H. A. LDL-C. B. HDL-C. C. Total Cholesterol. D. Triglycerides. Colour of the points corresponds to the strength of linkage disequilibrium ( $r^2$ ) of potential causal variant (rs7499892) identified in EUR ancestry, labelled and coloured in purple.**

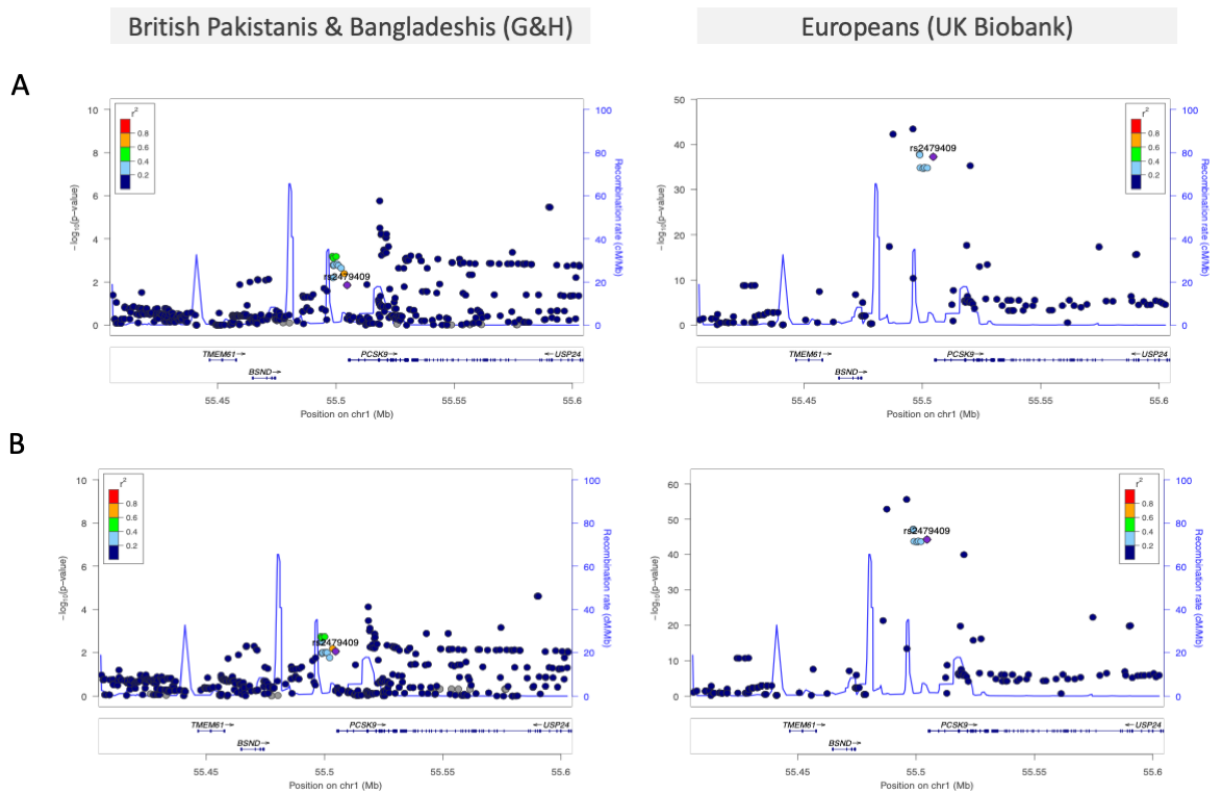

**Supplementary Figure. 6. Regional association plots for major lipid locus, *PCSK9* with unshared causal variant rs2479409 ( $p_{JLIM} > 0.05$ ) between British Pakistanis and Bangladeshis (G&H) and Europeans (UK Biobank). A. LDL-C. B. Total Cholesterol. Colour of the points corresponds to the strength of linkage disequilibrium ( $r^2$ ) of each potential causal variant (in brackets) identified in EUR ancestry, labelled and coloured in purple.**

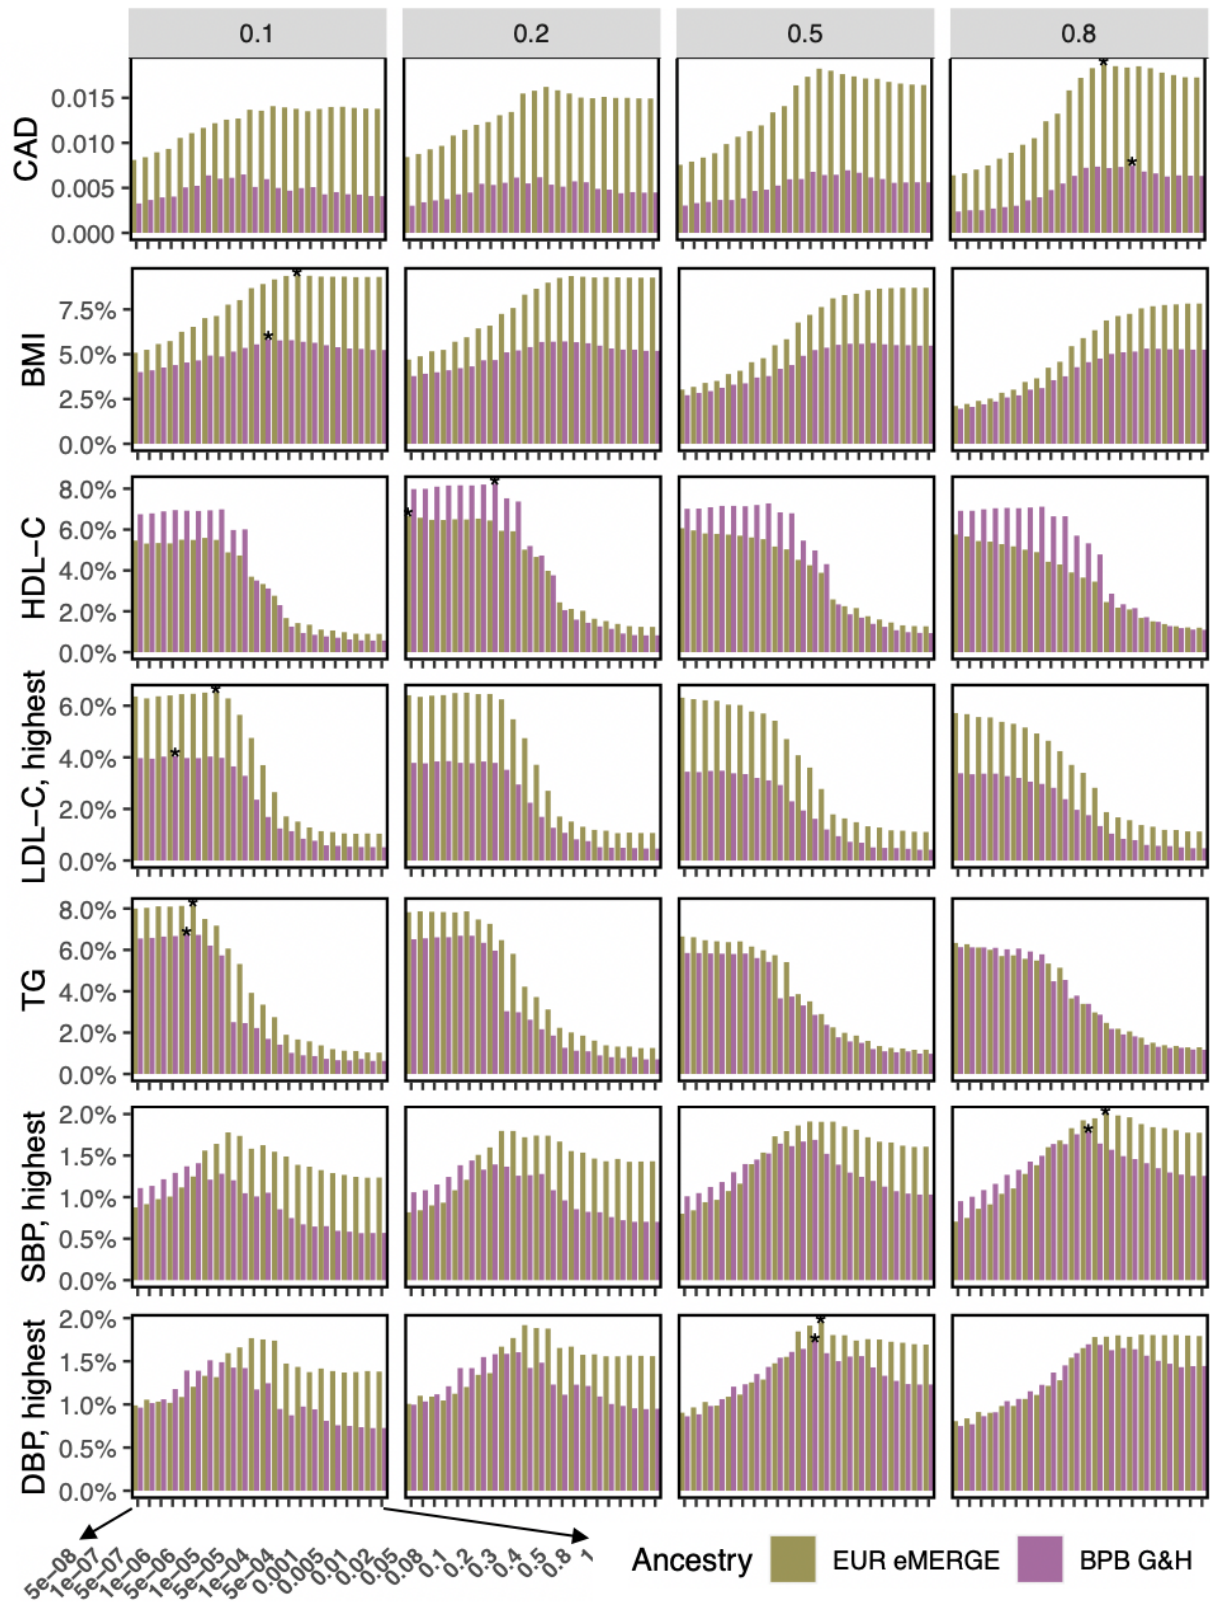

**Supplementary Figure 7. Predictive performance of polygenic scores (PGSs) across LD  $r^2$  and p-value thresholds.** Incremental AUC is shown for CAD and incremental  $R^2$  is shown for

the continuous risk factors. Purple indicates the performance in G&H and green in eMERGE. Bars represent PGSs constructed using combinations of various p-values (on x-axes) and LD clumping  $r^2$  thresholds (in the four columns). PGSs are sorted so that those on the right contain more SNPs. Asterisks indicate the reported PGSs with the highest accuracy per trait.

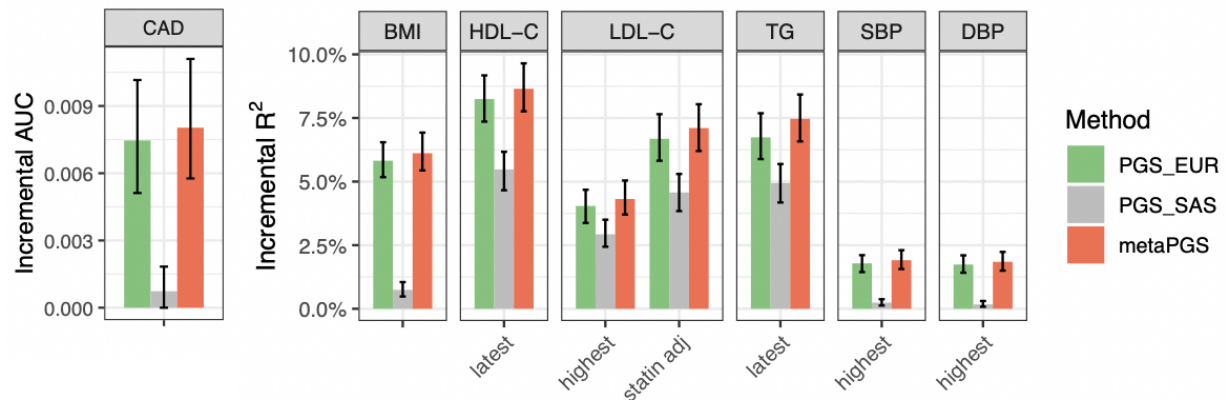

**Supplementary Figure 8. Predictive performance of polygenic scores (PGSs) that incorporate GWAS data from UK Biobank (UKBB) South Asian-ancestry individuals.**

Incremental AUC was calculated for CAD, and incremental  $R^2$  was calculated for its continuous risk factors. Colours indicate clumping and p-value thresholding PGSs that are constructed using different GWAS training data (green: GWAS statistics from European studies; grey: GWAS statistics from South Asian-ancestry samples from UKBB; red: meta-PGS, a linear combination of the previous two PGSs). Error bars indicate 95% confidence intervals estimated by bootstrap resampling of samples. Improvement in accuracy comparing the meta-PGSs (red) with the C+T PGS derived from European studies (green) is 8% for CAD, 5% for BMI, 5% for HDL-C, 7% for the highest LDL-C, 6% for the statin-adjusted LDL-C, 11% for TG, 7% for SBP, and 6% for DBP.

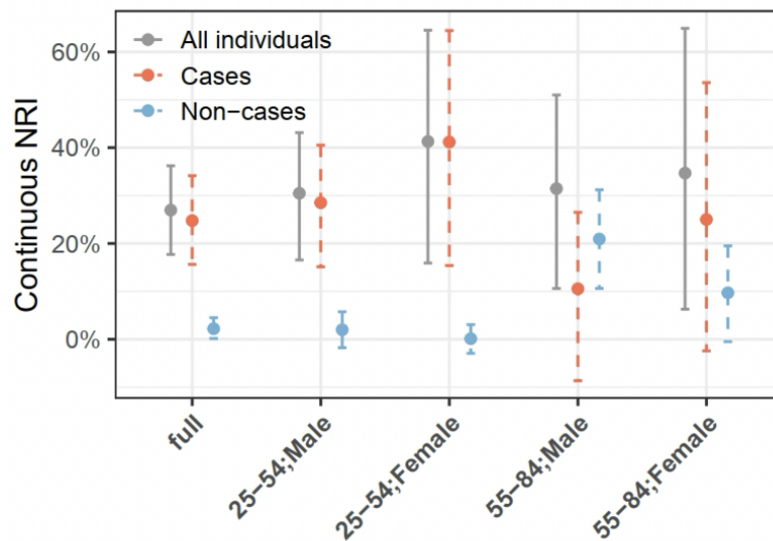

**Supplementary Figure 9. Continuous net reclassification index (NRI) for the integrated score compared to QRISK3 in all samples and age-by-gender subgroups.** Continuous NRI in cases (red) and non-cases (blue) are shown. The error bars indicate 95% CIs estimated using the bootstrap method.

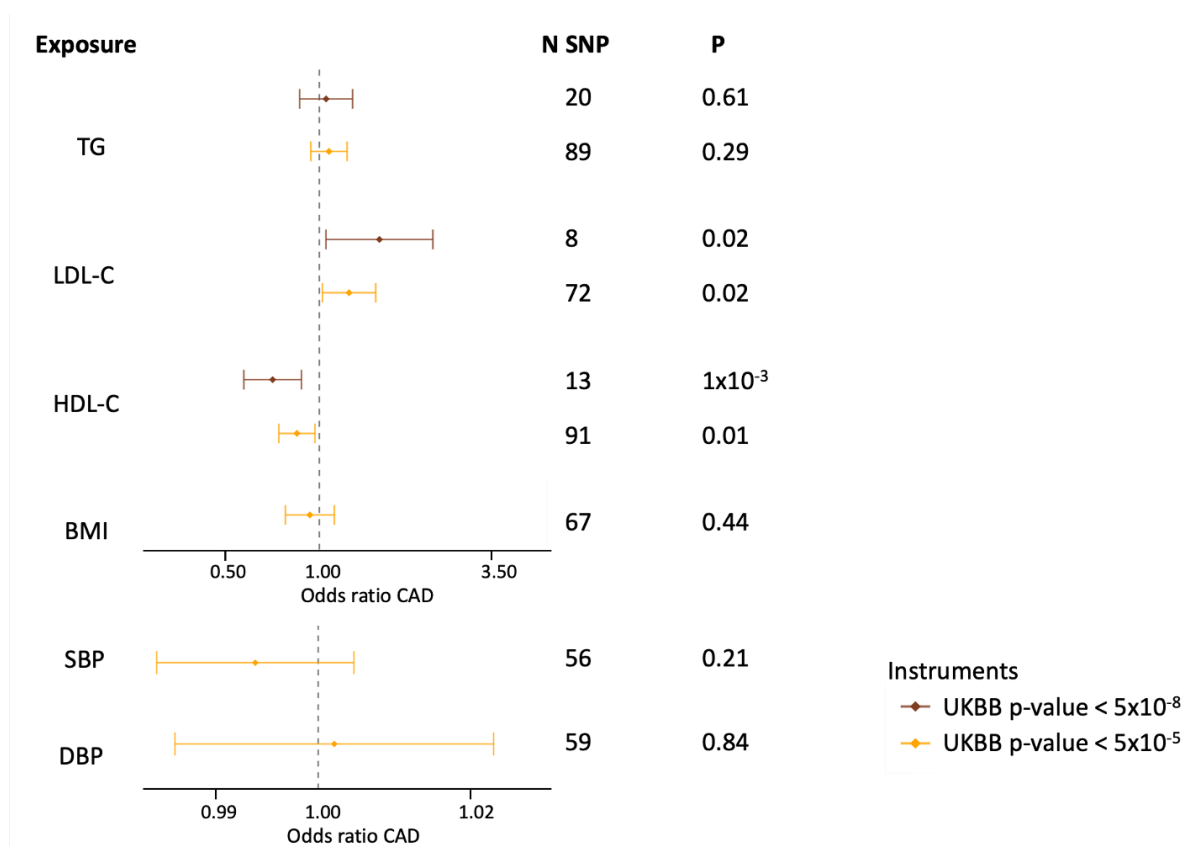

**Supplementary Figure 10. Mendelian randomisation (MR) estimates of the causal effects of risk factors on coronary artery diseases (CAD) in G&H using loci from ancestry-matched discovery GWAS as instruments.** Association of risk factors with CAD was assessed for instruments selected from UKBB SAS at two p-value thresholds:  $p < 5 \times 10^{-5}$  and  $p < 5 \times 10^{-8}$ . Effect estimates are presented as odds ratios with 95% confidence intervals per standard deviation increase in the reported unit of the trait: triglycerides (TG), systolic blood pressure (SBP), low-density lipoprotein cholesterol (LDL-C), high-density lipoprotein cholesterol (HDL-C), diastolic blood pressure (DBP), body mass index (BMI). The p-value (P) and number of SNP instruments (N SNP) included in the MR analysis are shown for each exposure.

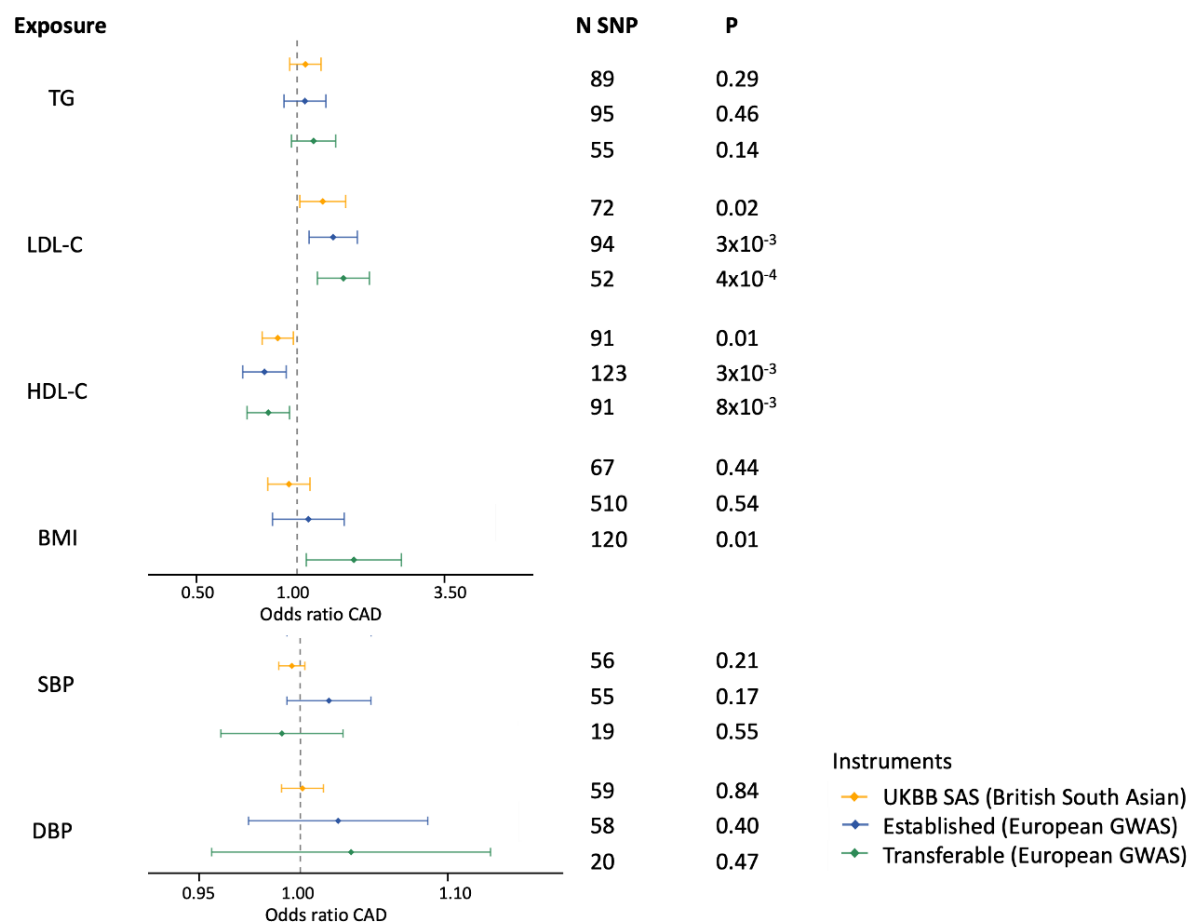

**Supplementary Figure 11. Mendelian randomisation estimates for risk factors on coronary artery disease using different strategies for instrument selection.** Two-sample Mendelian Randomisation (MR) using coronary artery disease risk (CAD) in G&H as the outcome. Genetic instrumental variables for the risk factors were selected based on different strategies: loci associated at  $p < 1 \times 10^{-5}$  in an ancestry-matched GWAS (UKBB SAS), all genome-wide significant loci from the largest EUR GWAS, and the subset of these loci that were transferable to SAS. Effect estimates are presented as odds ratios with 95% confidence intervals per standard deviation increase in the reported unit of the trait: triglycerides (TG), systolic blood pressure (SBP), low-density lipoprotein cholesterol (LDL-C), high-density lipoprotein cholesterol (HDL-C), diastolic blood pressure (DBP), body mass index (BMI). The p-value (P) and number of single nucleotide polymorphism instruments (N SNP) included in the MR analysis are shown for each exposure.

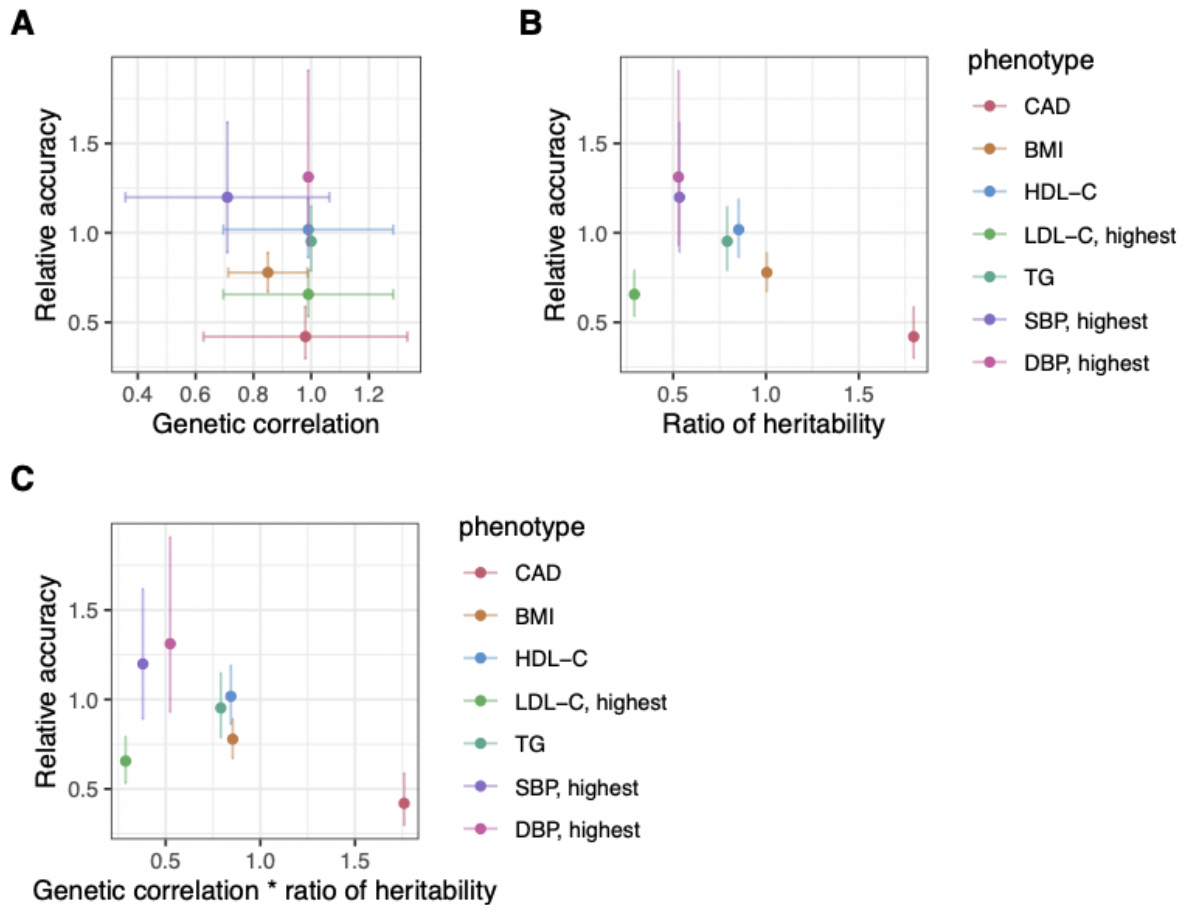

**Supplementary Figure 12. Relationship between the relative accuracy of PGSs and trans-ethnic genetic correlation and heritability estimates.** We used PGSs from the PGS Catalog. We show the relationship between relative accuracies of PGSs (i.e. the ratio of incremental AUC for CAD or incremental  $R^2$  for risk factors estimated in G&H to that in eMERGE) on the y-axes versus the trans-ethnic genetic correlation (**A**), ratio of the heritability estimates in G&H over UKB (**B**), and the product of the previous two terms (**C**). None of the correlations is significant.
